# Supplementary material for: Functional respiratory imaging assessment of glycopyrrolate and formoterol fumarate metered dose inhalers formulated using co-suspension delivery technology in patients with COPD
Source: PubMed Central journal article supplement — Ther Adv Respir Dis. 2020 May 7;14:1753466620916990. doi: 10.1177/1753466620916990 (PMC7225799; doi:10.1177/1753466620916990), 2020-05-07
Supplement: Reviewer_2_v.1.pdf [file Reviewer_2_v.1.pdf]

Reviewer 2 v.1

Comments to the Author

General comment:

This is a methodologically well-done paper with an aim to compare two long-term bronchodilators glycopyrrolate (GP MDI) and formoterol fumarate (FF MDI) by the use of new interesting method – functional respiratory imaging (FRI). Both bronchodilators improved the most important parameters of FRI – specific image-based airway volume (siVaw) and resistance (siRaw) and the improvements were larger for FF MDI.

Major comments

Question #1:

Both bronchodilators improved IC and siVaw, but there were almost no changes in FRC! How authors can explain this discrepancy?

Minor comments

No information was presented about smoking history of patients (only % of current smokers) and also about history of exacerbations and previous treatment.
